# Supplementary material
Source: PubMed Central journal article supplement (PMC3375925)
Supplement: supp_pp.112.195388_195388Supplemental_Information.pdf [file supp_pp.112.195388_195388Supplemental_Information.pdf]

**Supplemental Table S1.** Effects of various compounds on activity of TCE purified from tulip petals.

| Compound <sup>a</sup> | Concentration<br>(mM) | Relative activity <sup>b</sup><br>(%) |
|-----------------------|-----------------------|---------------------------------------|
| None                  | -                     | 100                                   |
| NaF                   | 0.2                   | 20.5                                  |
| PMSF                  | 2                     | 9.32                                  |
| AgNO <sub>3</sub>     | 0.2                   | < 0.1                                 |
| HgCl <sub>2</sub>     | 0.2                   | < 0.1                                 |
| CuSO <sub>4</sub>     | 2                     | 25.9                                  |

Enzyme activity was measured using 4 mM 6-tuliposide A as substrate.

<sup>a</sup> Compounds that inhibited activity >60% are shown. The following compounds showed less or no effects on enzyme activity: 1) coenzymes (0.05 mM), FMN, FAD, riboflavin, pyridoxal-5'-phosphate, NAD(P)(H), biotin, thiamine-HCl, phenazinemethosulfate, pyrroloquinoline quinone, thiooctic acid, XTP (X; A, G, C, and T), XDP, XMP, thioglycolic acid, cysteamine, glutathione (oxidized and reduced forms), L-Cys, iodonitrotetrazolium, dehydroascorbic acid, and L-ascorbic acid; 2) metal ions (2 mM), Li<sup>+</sup>, BO<sub>3</sub><sup>2+</sup>, Na<sup>+</sup>, Mg<sup>2+</sup>, Al<sup>3+</sup>, K<sup>+</sup>, Ca<sup>2+</sup>, V<sup>3+</sup>, Cr<sup>3+</sup>, Mn<sup>2+</sup>, Fe<sup>2+</sup>, Co<sup>2+</sup>, Ni<sup>2+</sup>, Zn<sup>2+</sup>, As<sup>3+</sup>, Rb<sup>+</sup>, Nb<sup>5+</sup>, Mo<sup>2+</sup>, Cd<sup>2+</sup>, Sn<sup>2+</sup>, Cs<sup>+</sup>, Tl<sup>2+</sup>, Ba<sup>2+</sup>, and Pb<sup>2+</sup>; and 3) other compounds (2 mM), *p*-chloromercuribenzoic acid, EDTA, EGTA, bipyridyl, *o*-phenanthroline, disodium catechol-3,5-disulfonate, 8-hydroxyquinoline, hydrazine, diphenylhydrazine, hydroxylamine, KCN, NaN<sub>3</sub>, iodoacetate, *N*-ethylmaleimide, 5,5'-dithiobis(2-nitrobenzoate), D-cycloserine, D-penicillamine, dithiothreitol, K<sub>4</sub>(Fe(CN)<sub>6</sub>), and K<sub>3</sub>(Fe(CN)<sub>6</sub>).

<sup>b</sup> Activity is shown as percent ratio of specific activity to that without additive (2,260 U/mg).

**Supplemental Table S2.** Primer sequences used in this study.

| Primer name                                                          | Sequence (5' to 3')            |
|----------------------------------------------------------------------|--------------------------------|
| <b>For degenerate PCR</b>                                            |                                |
| TCEA-N-F1 <sup>a</sup>                                               | GCIYTIGAYGAYGARATHGT           |
| TCEA-N-F2 <sup>a</sup>                                               | GAYGAYGARATHGTIYTIGA           |
| TCEA-Int-R1 <sup>b</sup>                                             | ACIGTIGTICCIARRAAICKYTC        |
| TCEA-Int-R2 <sup>b</sup>                                             | CCIARRAAICKYTCDATIGGICC        |
| <b>For RACE PCR</b>                                                  |                                |
| TCEA-5RACE-R1                                                        | ACTCTTGTAATGATCAAGAAGG         |
| TCEA-3RACE-F1                                                        | CCTGAAGCCCTTCTTGATCATTTAC      |
| TCEA-3RACE-F2                                                        | GCCCTTCTTGATCATTTACAAGAG       |
| <b>For full-length cDNA cloning, genomic DNA cloning, and RT-PCR</b> |                                |
| TCEA-RT-F                                                            | AAGCATTCTGTGAAATCAATTAAGTG     |
| TCEA-RT-R                                                            | CATCATAACAATGCCTTAAAGAGG       |
| <b>For RT-PCR</b>                                                    |                                |
| TCEA-RT-F1                                                           | TCAGTAGCCTCGTTCTTTAGCT         |
| TCEA-RT-F2                                                           | CTTTAGCTCGCTGCCTGCTAGG         |
| TCEA-RT-F3                                                           | AAGATGGGCGAGGCAGGACT           |
| TCEA-RT-R1                                                           | CTCTCCACCAGAAAATCATTTC         |
| TCEA-RT-R2                                                           | GTCATGAAACTCAATGTTCG           |
| GAPDH-F                                                              | GGAATCCTTGTTATGTTGAAG          |
| GAPDH-R                                                              | TACTTGGTTGCGGCAATGTGG          |
| <b>For qRT-PCR</b>                                                   |                                |
| TgTCEA1-qRT-F                                                        | TTGGTGAAGAGCGGGTGGC            |
| TgTCEA1-qRT-R                                                        | GAAACCCTAACAAGAAGCAGCG         |
| TgTCEA2-qRT-F                                                        | AAGAGCGGGTGGGGAGGT             |
| TgTCEA2-qRT-R                                                        | CAAACCCTAACAAGAAGCAACA         |
| <b>For <i>E. coli</i> expression plasmids</b>                        |                                |
| TCEA-F-BamHI                                                         | CGCGGATCCGCTTTAGACGACGAAATTGTG |
| TCEA-R-XhoI                                                          | GGGCTCGAGCTACTCGCCTTTGAGAAAAGC |

Supplemental Table S2 (continued)

|                                  |                                               |
|----------------------------------|-----------------------------------------------|
| TCEA-G152A-F                     | CTACTTCCACGCTGGCGGCTTCGT                      |
| TCEA-G152A-R                     | ACGAAGCCGCCAGCGTGGAAGTAG                      |
| TCEA-G153A-F                     | CTTCCACGGAGCCGGCTTCGTCA                       |
| TCEA-G153A-R                     | TGACGAAGCCGGCTCCGTGGAAG                       |
| TCEA-G154A-F                     | CCACGGAGGCGCCTTCGTCATCG                       |
| TCEA-G154A-R                     | CGATGACGAAGGCGCCTCCGTGG                       |
| TCEA-S235A-F                     | CTTTCAGGTGACGCCGCGGCGCAA                      |
| TCEA-S235A-R                     | TTGCCGCCGGCGGCGTCACCTGAAAG                    |
| TCEA-D327N-F                     | GTGGCGGGAAATAATTTTCTGGTG                      |
| TCEA-D327N-R                     | CACCAGAAAATTATTTCCCGCCAC                      |
| TCEA-H359A-F                     | GAGGGGGTTCGGTGCTGTGTTTCATCT                   |
| TCEA-H359A-R                     | AGATGAAACACAGCACCGACCCCCTC                    |
| TCEA-H362A-F                     | GGTCATGTGTTTGCTCTGTCTGAT                      |
| TCEA-H362A-R                     | ATCAGACAGAGCAAACACATGACC                      |
| <b>For GFP reporter plasmids</b> |                                               |
| TCEA-rep-F1                      | TCTAGAGGATCCATGTCAGTAGCCTCGTTCTTTAGC          |
| TCEA-rep-F2                      | TCTAGAGGATCCATGGCTTTAGACGACGAAATTGTGTTG       |
| TCEA-rep-R1                      | CCCTTGCTCACCATGGACTCGCCTTTGAGAAAAGCAAT<br>C   |
| TCEA-rep77-R                     | CCCTTGCTCACCATGGATGTGGGCGTCCGGAGAGAGAGA<br>TG |
| TCEA-rep60-R                     | CCCTTGCTCACCATGGAAAATACAGAAGTAACAGAACC        |
| TCEA-rep55-R                     | CCCTTGCTCACCATGGAAGAACCATGGTATGTATTGC         |
| TCEA-rep50-R                     | CCCTTGCTCACCATGGAATTGCTTTCTATAGGACGAC         |
| TCEA-rep45-R                     | CCCTTGCTCACCATGGAACGACAGGCTAGAACCGGCGG<br>CT  |
| TCEA-rep44-R                     | CCCTTGCTCACCATGGAACAGGCTAGAACCGGCGGCTT<br>AAC |

Supplemental Table S2 (continued)

---

|              |                                             |
|--------------|---------------------------------------------|
| TCEA-rep43-R | CCCTTGCTCACCATGGAGGCTAGAACCGGCGGCTTAAC<br>C |
| TCEA-rep42-R | CCCTTGCTCACCATGGATAGAACCGGCGGCTTAACCATC     |
| TCEA-rep41-R | CCCTTGCTCACCATGGAAACCGGCGGCTTAACCATCC       |
| TCEA-rep40-R | CCCTTGCTCACCATGGACGGCGGCTTAACCATCCGTC       |
| TCEA-rep20-R | CCCTTGCTCACCATGGACCCATCTTTGTATCCAAAAGG      |

---

'F' and 'R' in the primer name indicate 'forward' and 'reverse' primers, respectively.

<sup>a</sup> Designed from N-terminal amino acid sequence, ALDDEIVLDL.

<sup>b</sup> Designed from internal amino acid sequence, SG(R/P)IERFLGTTV.

|         |                                                                              |     |   |     |   |     |       |
|---------|------------------------------------------------------------------------------|-----|---|-----|---|-----|-------|
|         | *                                                                            | 20  | * | 40  | * | 60  |       |
| TgTCEA1 | <u>MSVASFFSSLPARPFQYKDGRRGTGMVPTTDIGRRMVKPPVLACRPIESNTYHGSVTSVF</u>          |     |   |     |   |     | : 60  |
| TgTCEA2 | <u>MSVASFFSSLPARPFQYKDGRRGTGMVSTTDIGRRMVKPPVLACRPIESNTYHG---</u> SVF         |     |   |     |   |     | : 57  |
| <hr/>   |                                                                              |     |   |     |   |     |       |
|         | *                                                                            | 80  | * | 100 | * | 120 |       |
| TgTCEA1 | <u>LTKSSRSPSPSLSPPTALDDEIVLCLKPFLIIYKSGRIERFLGTTVIPACPEVATKDVV</u>           |     |   |     |   |     | : 120 |
| TgTCEA2 | <u>LTKSSRSPSPSLSPPTALDDEIVLCLKPFLIIYKSGRIERFLGTTVIPACPEVATKDVV</u>           |     |   |     |   |     | : 117 |
| <hr/>   |                                                                              |     |   |     |   |     |       |
|         | *                                                                            | 140 | * | 160 | * | 180 |       |
| TgTCEA1 | <u>IDPATGVSURLYLPNVVDLPSKKLPVLVVFHGGGFVIENTGSPNYHNYLTLAAKAGVLI</u>           |     |   |     |   |     | : 180 |
| TgTCEA2 | <u>IDPATGVSURLYLPNVVDLPSKKLPVLVVFHGGGFVIENTGSPNYHNYLTLAAKAGVLI</u>           |     |   |     |   |     | : 177 |
| <hr/>   |                                                                              |     |   |     |   |     |       |
|         | *                                                                            | 200 | * | 220 | * | 240 |       |
| TgTCEA1 | <u>VSINYLRAPEYPLPASYDDCMAGFNWVSHSAGP&amp;LEPULAQHGDFSQILLSGDSAGGNV</u>       |     |   |     |   |     | : 240 |
| TgTCEA2 | <u>VSINYLRAPEYPLPASYDDCMAGFNWVSHSAGP&amp;LEPULAQHGDFSQILLSGDSAGGNV</u>       |     |   |     |   |     | : 237 |
| <hr/>   |                                                                              |     |   |     |   |     |       |
|         | *                                                                            | 260 | * | 280 | * | 300 |       |
| TgTCEA1 | <u>THYVAMRADAGVIEGVAIVHPYFLGSEPVGNEINDP&amp;NIEFHDKLWRLA&amp;APDTEGLDDPL</u> |     |   |     |   |     | : 300 |
| TgTCEA2 | <u>THYVAMRADAGVIEGVAIVHPYFLGSEPVGNEINDP&amp;NIEFHDKLWRLA&amp;APDTEGLDDPL</u> |     |   |     |   |     | : 297 |
| <hr/>   |                                                                              |     |   |     |   |     |       |
|         | *                                                                            | 320 | * | 340 | * | 360 |       |
| TgTCEA1 | <u>INPVAPGAPSLAGLKCKRAVVFVAGNDFLVERGRMYE&amp;LVKSGWRGEAELVQHEGVGHV</u>       |     |   |     |   |     | : 360 |
| TgTCEA2 | <u>INPVAPGAPILAGLKCKRAVVFVAGNDFLVERGRMYE&amp;LVKSGWGEAELVQHEGVGHV</u>        |     |   |     |   |     | : 357 |
| <hr/>   |                                                                              |     |   |     |   |     |       |
|         | *                                                                            | 380 |   |     |   |     |       |
| TgTCEA1 | <u>FHLSDYSGDISVAMMTKLI&amp;AFLKGE</u>                                        |     |   |     |   |     | : 385 |
| TgTCEA2 | <u>FHLSDYSGDISVAMMTKLI&amp;AFLKGE</u>                                        |     |   |     |   |     | : 382 |

**Supplemental Figure S1. Alignment of amino acid sequences of TgTCEA1 and TgTCEA2.** Sequences found by protein sequencing of enzyme purified from tulip tissues are indicated with *black* underlines. N-terminus of mature enzyme is based on protein sequencing of anther enzyme, as petal enzyme did not yield exclusively single amino acid signals in its N-terminal sequencing. Internal peptide sequences are from petal enzyme. Signal peptides are indicated with *gray* underline. Residues constituting putative catalytic triad (S, D, and H) and oxyanion hole (HGGG-motif and Ala next to catalytic Ser) are indicated with *black* triangles and boxes, respectively, and those subjected to the site-directed mutagenesis are marked with *red* circles.

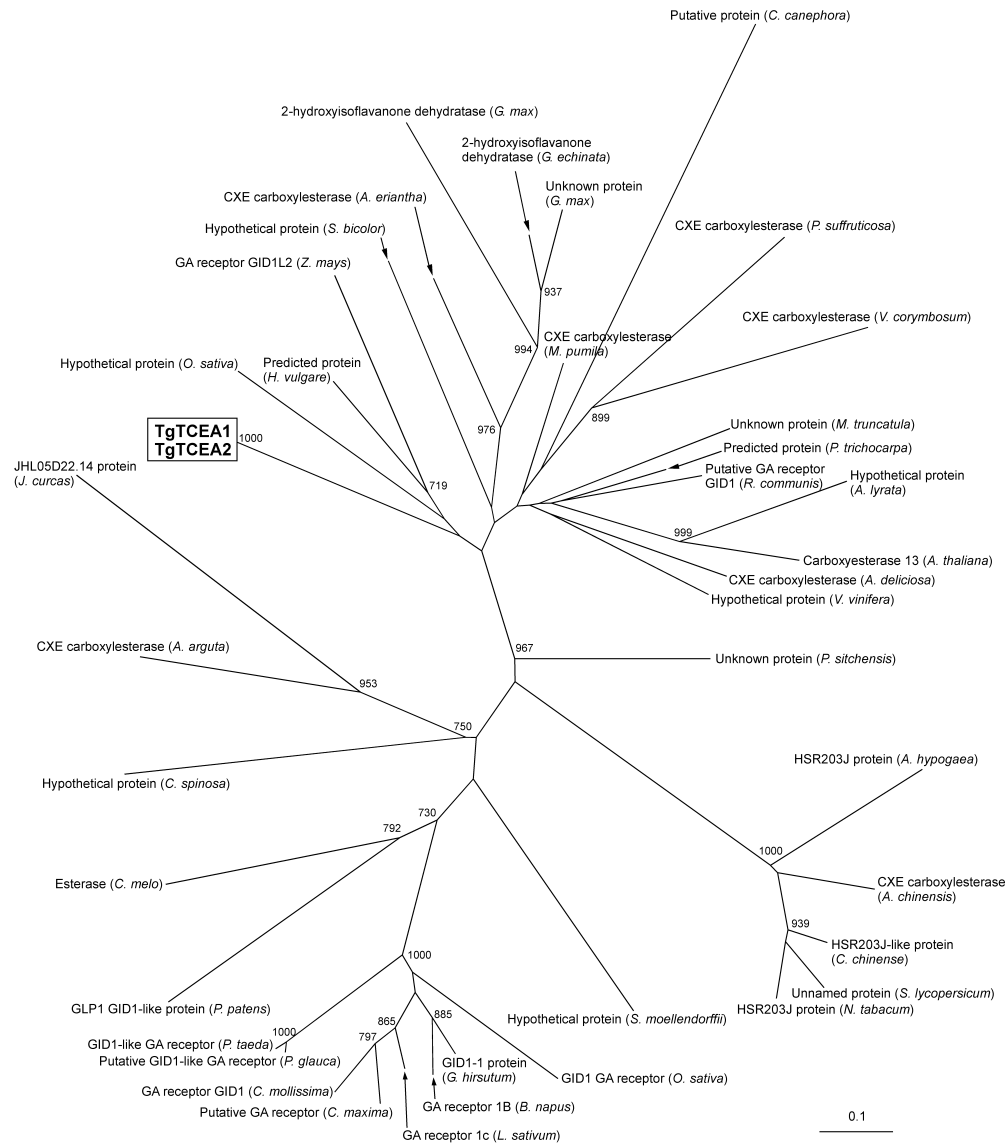

**Supplemental Figure S2. Unrooted phylogenetic tree of TgTCEA enzymes with selected members of plant  $\alpha/\beta$  hydrolase fold superfamily proteins.** Full-length amino acid sequences were aligned using ClustalW (version 1.83; <http://clustalw.ddbj.nig.ac.jp/top-j.html>). Phylogenetic tree was built based on calculation by neighbor-joining method with bootstrap analysis of 1,000 replicates and visualized with Treeview (version 1.66). Numbers at each node are bootstrap values per 1,000 trials (values >70% are shown). Scale bar indicates substitutions per site. Accession numbers for proteins listed are BAE45340 (*Oryza sativa*, *GID1* GA receptor), NP\_001063395 (*Oryza sativa*, hypothetical protein), XP\_002285067 (*Vitis vinifera*, hypothetical protein), XP\_002336023 (*Populus trichocarpa*, predicted protein), XP\_002462498 (*Sorghum bicolor*, hypothetical protein), XP\_002518790 (*Ricinus communis*, putative GA receptor *GID1*), BAJ94344 (*Hordeum vulgare*, predicted protein), XP\_002875213 (*Arabidopsis lyrata*, hypothetical protein), NP\_001152298 (*Zea mays*, GA receptor *GID1L2*), ABB89006 (*Malus pumila*, CXE carboxylesterase), NP\_190439 (*Arabidopsis thaliana*, carboxylesterase 13), ACJ84504 (*Medicago truncatula*, unknown protein), BAD80839 (*Glycyrrhiza echinata*, 2-hydroxyisoflavanone dehydratase), BAD80840 (*Glycine max*, 2-hydroxyisoflavanone dehydratase), ABW74473 (*Paeonia suffruticosa*, CXE carboxylesterase), ACU19943 (*Glycine max*, unknown protein), ABK23572 (*Picea sitchensis*, unknown protein), ABB89023 (*Actinidia eriantha*, CXE carboxylesterase), ABB89018 (*Actinidia deliciosa*, CXE carboxylesterase), ABB89000 (*Vaccinium corymbosum*, CXE carboxylesterase), XP002970604 (*Salaginella moellendorffii*, hypothetical protein), ADF18551 (*Arachis hypogaea*, HSR203J protein), BAA74434 (*Solanum lycopersicum*, unnamed protein), BAC15624 (*Nicotiana tabacum*, HSR203J protein), ABB89024 (*Actinidia chinensis*, CXE carboxylesterase), BAD11070 (*Capsicum chinense*, HSR203J-like protein), XP\_001757066 (*Physcomitrella patens*, GLP1 *GID1*-like protein), ABB89014 (*Actinidia arguta*, CXE carboxylesterase), ACN86356 (*Gossypium hirsutum*, *GID1*-1), CAP64321 (*Picea glauca*, putative *GID1*-like GA receptor), CAN87127 (*Cucurbita maxima*, putative GA receptor), ABZ89192 (*Coffea canephora*, putative protein), ADN93297 (*Lepidium sativum*, GA receptor 1c), ABD96915 (*Cleome spinosa*, hypothetical protein), BAJ53143 (*Jatropha curcas*, JHL05D22.14), ABQ53633 (*Cucumis melo*, esterase), CAP64323 (*Pinus taeda*, *GID1*-like GA receptor), ADV36285 (*Castanea mollissima*, GA receptor *GID1*), and ADT78692 (*Brassica napus*, GA receptor 1B).

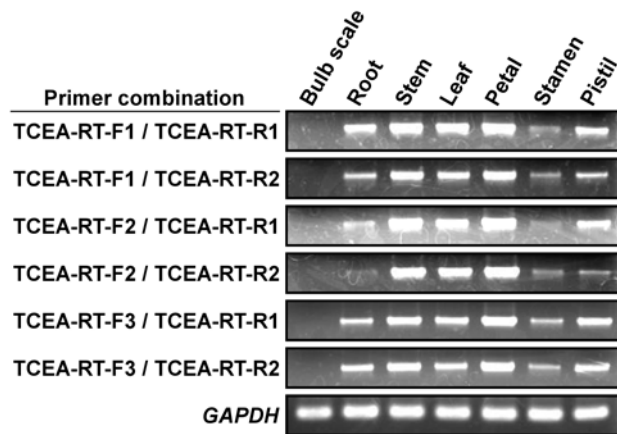

**Supplemental Figure S3. Transcript analysis of *TgTCEA* genes in tulip tissues by RT-PCR with various primer sets.** Three forward- and two reverse primers were designed from common sequences to the *TgTCEA1* and *TgTCEA2* genes (see Supplemental Table S2 for primer sequences). PCR products were not detected in bulb scales with any primer combinations. *GAPDH* gene was amplified to show the validity of each cDNA template.

**A**

```

TP20: MSVASFFSSLPARPFYKDG
TP40: MSVASFFSSLPARPFYKDGGRGRTGMVPTTDIGRRMVKPP
TP41: MSVASFFSSLPARPFYKDGGRGRTGMVPTTDIGRRMVKPPV
TP42: MSVASFFSSLPARPFYKDGGRGRTGMVPTTDIGRRMVKPPVL
TP43: MSVASFFSSLPARPFYKDGGRGRTGMVPTTDIGRRMVKPPVLA
TP44: MSVASFFSSLPARPFYKDGGRGRTGMVPTTDIGRRMVKPPVLAC
TP45: MSVASFFSSLPARPFYKDGGRGRTGMVPTTDIGRRMVKPPVLACR
TP50: MSVASFFSSLPARPFYKDGGRGRTGMVPTTDIGRRMVKPPVLACRPIESN
TP55: MSVASFFSSLPARPFYKDGGRGRTGMVPTTDIGRRMVKPPVLACRPIESNTYHGS
TP60: MSVASFFSSLPARPFYKDGGRGRTGMVPTTDIGRRMVKPPVLACRPIESNTYHGSVTSVF

```

**TP77: MSVASFFSSLPARPFYKDGGRGRTGMVPTTDIGRRMVKPPVLACRPIESNTYHGSVTSVFLTKSSRSPSPSLSPPTT**

**B**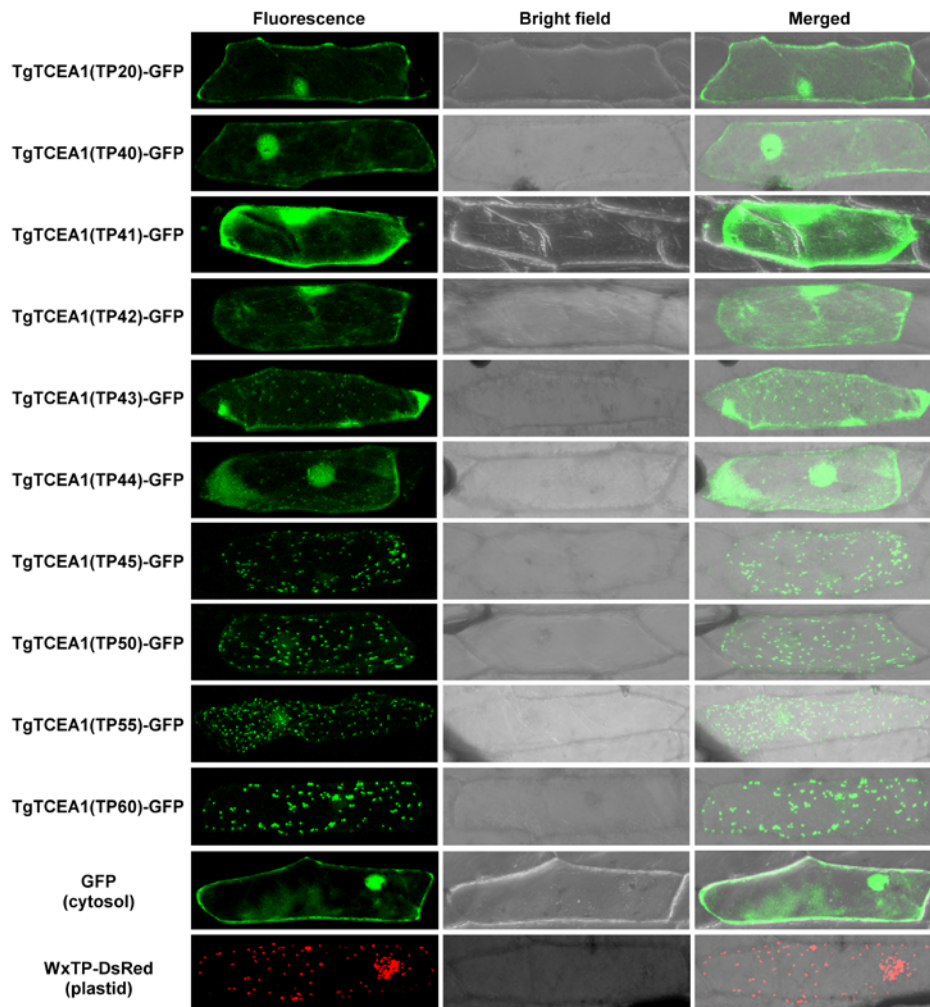

**Supplemental Figure S4. Subcellular localization of GFPs fused with deletion series of the plastid-targeted signal of TgTCEA1 in onion epidermal cells.** Different length of N-terminal plastid-targeted signal of TgTCEA1 was fused to GFP and transiently expressed in onion epidermal cells to determine minimal length of N-terminal peptide that functions as plastid-targeted signal. (A) Amino acid sequences of the deletion series of N-terminal transit peptide (TP). The number indicates peptide length in amino acid. Seventy-seven amino-acid peptide (TP77) that was demonstrated to function as plastid-targeted signal (Fig. 6) was indicated with *red*. (B) Subcellular localization of the GFPs fused with deletion series of N-terminal TPs shown in (A). Non-targeted GFP is the control for cytosolic localization. WxTP-DsRed that expresses transit peptide of Waxy protein fused to DsRed is the control for plastidial localization (Kitajima et al., 2009). Fluorescence signals in the nucleus are attributable to free diffusion of the protein (Dingwall and Laskey, 1986).
